# Supplementary material for: The association of painful and non-painful morbidities with frailty: a cross sectional analysis of a cohort of community dwelling older people in England
Source: Springer Nature journal article supplement (doi:10.1186/s12877-023-04602-w), 2024-02-15
Supplement: MOESM1 [file 26739374]

## **The association of painful and non-painful morbidities with frailty: a cross sectional analysis of a cohort of community dwelling older people.**

### **Additional Figures**

Additional Figure 1. IMH&W Questionnaire medical condition checklist.

Additional Figure 2. IMH&W Flow Diagram with missing data details.

### **Additional Tables**

Additional Table 1. Illness criteria for classification of morbidity free text.

Additional Table 2. Medications indicating specific illnesses.

Additional Table 3. Morbidity count by checklist and augmentation (n=6,342)

Additional Table 4. Bivariate associations between morbidity count and covariables.

Additional Table 5. Associations of frailty with standardised NRS pain and other characteristics.

- **Additional Figure 1. IMH&W Questionnaire medical condition checklist.**

**Has a doctor told you that you have any of these medical conditions or problems?  
If yes, please place a tick in the boxes provided.**

- |                                                          |                                               |
|----------------------------------------------------------|-----------------------------------------------|
| <input type="checkbox"/> Angina                          | <input type="checkbox"/> Heart attack         |
| <input type="checkbox"/> Arthritis                       | <input type="checkbox"/> Heart failure        |
| <input type="checkbox"/> Asthma                          | <input type="checkbox"/> Hypertension         |
| <input type="checkbox"/> Back or spine problems          | <input type="checkbox"/> Kidney disease       |
| <input type="checkbox"/> Cancer (not minor skin cancers) | <input type="checkbox"/> Lung disease         |
| <input type="checkbox"/> Dementia                        | <input type="checkbox"/> Osteoarthritis       |
| <input type="checkbox"/> Diabetes mellitus               | <input type="checkbox"/> Osteoporosis         |
| <input type="checkbox"/> Fibromyalgia                    | <input type="checkbox"/> Rheumatoid arthritis |
| <input type="checkbox"/> Gout                            | <input type="checkbox"/> Stroke               |

Others (please specify any conditions not listed above)

**Medicines including pain killers**

**Please write down the names of any medications, including any pain killers, that you use. They can be prescriptions or bought over the counter.**

Names of medications

- Additional Figure 2. IMH&W Flow Diagram with missing data details.

**IMH&W Database**

**Baseline**

**Analysis**

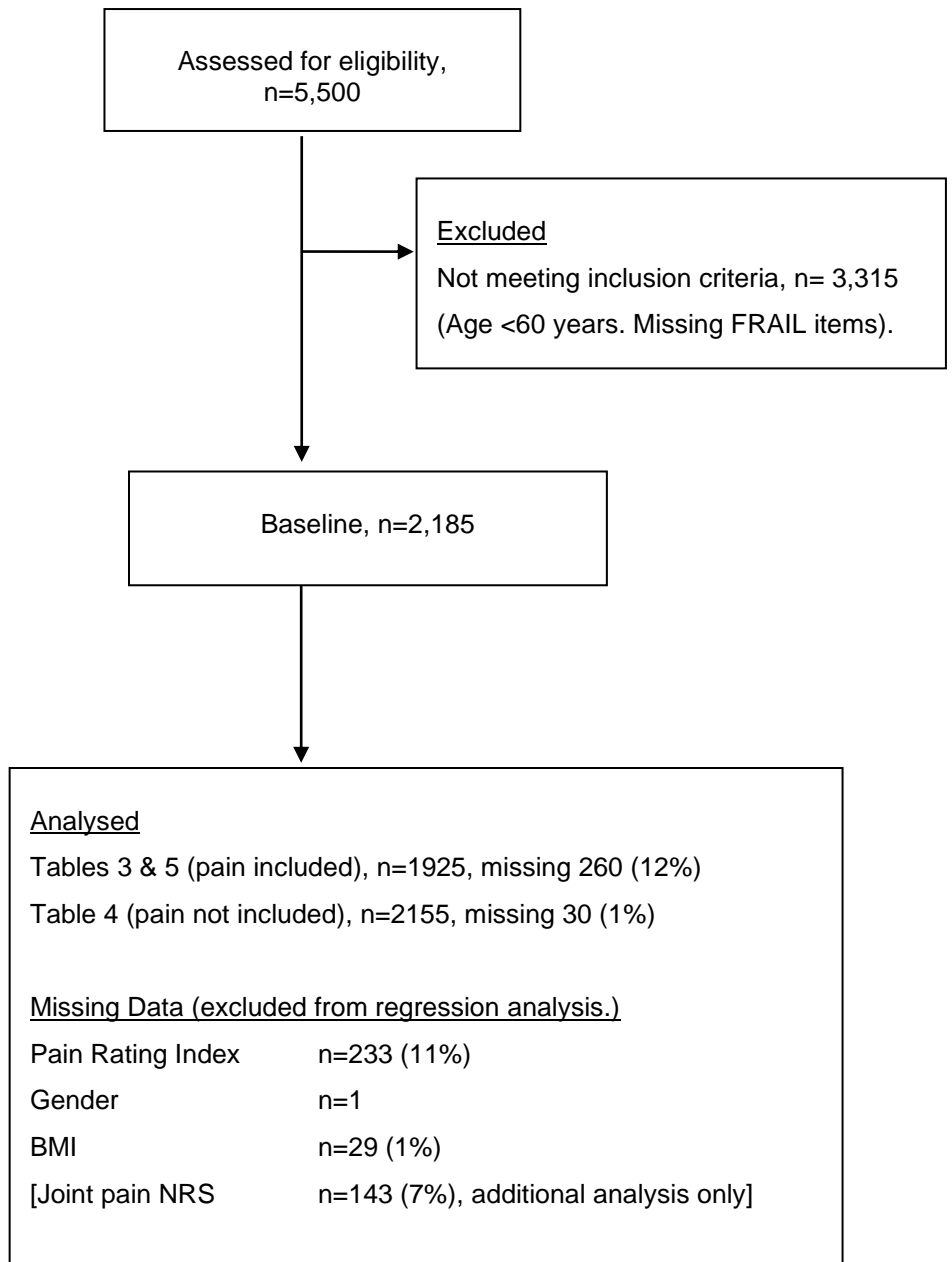

- **Additional Table 1. Illness criteria for classification of morbidity free text.**

| Illness condition              | Illness inclusion criteria                                                                                                                                                                                                                                                       |
|--------------------------------|----------------------------------------------------------------------------------------------------------------------------------------------------------------------------------------------------------------------------------------------------------------------------------|
| Diabetes                       | Include type 1 or 2 diabetes on medication; exclude if pre-diabetic or controlled by diet alone                                                                                                                                                                                  |
| Cerebrovascular disease        | Include stroke or TIA; cavernous angiomas multiple brain, brain aneurysm, brain haemorrhage.                                                                                                                                                                                     |
| Hypertension                   | Hypertension or high blood pressure                                                                                                                                                                                                                                              |
| Angina                         | Angina also include those who had coronary artery bypass graft, and those initially admitted with unstable angina. Include those who report insertion of stents and any heart bypass.                                                                                            |
| Congestive heart failure       | Includes heart failure and exertional or paroxysmal nocturnal dyspnoea.                                                                                                                                                                                                          |
| Myocardial infarction          | Include if any heart attack old or new, includes cardiac arrest.                                                                                                                                                                                                                 |
| Osteoarthritis, gout           | osteoarthritis and gout and arthritis                                                                                                                                                                                                                                            |
| RA + connective tissue disease | Include all inflammatory arthritis, including ankylosing spondylitis, psoriatic arthritis, RA, and inflammatory systemic conditions such as polymyalgia rheumatica, systemic lupus erythematosus, lupus, polymyositis, seronegative arthritis.                                   |
| Asthma                         | Include any form of possible reversible airways obstruction, whether or not there is additional fixed obstruction or other lung pulmonary deficits this means that a patient reporting to have only COPD who is prescribed one of these will also be classified as having asthma |
| Lung disease                   | Include any non-reversible-airway limitation. Chronic obstructive pulmonary disease (COPD), acquired respiratory distress syndrome (ARDS), emphysema, pulmonary embolism, and thromboembolic pulmonary hypertension or permanent lung impairment such as resection.              |
| Renal disease                  | Include patients on dialysis, those who had a transplant, and those with uraemia.                                                                                                                                                                                                |
| Cancer                         | Include all cancers, tumours or mention of chemotherapy/ radiotherapy or other cancer treatment <u>regardless</u> of when it occurred. Exclude if minor skin cancer.                                                                                                             |

Note: Osteoarthritis and Rheumatoid arthritis categories were collapsed into one called arthritis.

- **Additional Table 2. Medications indicating specific illnesses.**

- **Angina**

Glyceryl trinitrate:  
 1-glyceryl nasal spray  
 2-gtn spray (mouth spray)  
 3-gtn tablets  
 4-nitromin spray  
 5-nitrolingual pump spray  
 Ranolazine  
 Nicorandil  
 Isorbide mononitrate  
 Isorbide dinitrate  
 Tardisc xl  
 Monomil xl  
 Isotard xl

- **Asthma**

Drugs in the class selective beta2-agonists (short-acting)  
 Salbutamol:  
 Salamol easi-breathe cfc-free inhaler Ventolin  
 100micrograms/dose evohaler  
 Drugs in the class inhaled corticosteroids:  
 Beclometasone dipropionate  
 Qvar easi-breathe inhaler  
 Clenil modulite inhaler  
 Budesonide with formoterol  
 Formoterol fumate  
 Symbicort 100/6 turbohaler  
 Beclometason with formoterol  
 Fostair nexthaler® 200/6  
 Fluticasone with salmeterol  
 Airflusal  
 Seretide evohaler  
 Beclomethasone dipropionate  
 Becotide 50 inhaler  
 Budesonide  
 Pulmicort turbohaler  
 Fluticasone with salmeterol  
 Salmeterol  
 Seretide evohaler  
 Seretide 250 accuhaler  
 Sirdupla inhaler  
 Terbutaline sulfate

Others:  
 Uniphyllin continus  
 Tiotropium  
 Acclidinium bromide with formoterol

Acclidinium bromide  
 Glycopyrronium with indacaterol

Nucala inhaler  
 Mepolizumab  
 Trimbrow inhaler

- **Osteoarthritis, gout**

Colchicine  
 Alluprinol  
 Febuxostat

- **RA + connective tissue disease\***

\*Put in a conditional argument (rituximab if not lymphoma), all anti-tnfs if not ulcerative colitis/ Crohn's

Drugs in the class tumour necrosis factor alpha (tnf-a) inhibitors:

Etanercept  
 Benepalil solution for injection pre-filled syringes  
 Enbrel solution for injection pre-filled myclic pens  
 Erelzsolution for injection pre-filled syringes

Drugs in the class disease-modifying anti-rheumatic:

Leflunomide tablets  
 Drugs in the class t-cell activation inhibitors:  
 Abatacept  
 Orencia solution for injection pre-filled syringes

Drugs in the class interleukin inhibitors:

Tocilizumab  
 Adalimumab  
 Benepali  
 Betamethasonevalerat  
 Hycophenolate  
 Hydroxychloroquine  
 Levo humira  
 Metoject  
 Nivestim  
 Methrotexate  
 Sulphasalazine  
 Leflunomide

All anti-tnfs (unless psoriasis or inflammatory bowel disease, rituximab, tocilizumab)

Infliximab  
 Cyclophosphamide

- **Diabetes**

Alogliptin  
Basaglar insulin  
Bolamyn SR  
Dapagliflozin  
Dulaglutide  
Empagliflozin  
Forxiga  
Gliclazide  
Gliclazide  
Glimepiride  
Glucophage  
Humulin  
Insulin  
Januvia  
Jardiance  
Levemir insulin  
Levo linagliptin  
Linagliptin  
Liraglutide  
Metabet  
Metformin  
Novomix  
Pioglitazone  
Sitagliptin  
Sukkarto  
Synjardy  
Toujeo  
Trajenta  
Victoza  
Vipidia  
Zicron

- **Hypertension**

Calcium-channel blockers:  
Lacidipine  
Lercanidipine hydrochloride  
Securon SR tablets  
Drugs in the class non-diuretic thiazide:  
Indapamide  
Drugs in the class antihypertensives, centrally acting:  
Moxonidine

- **Lung disease**

drugs in the class mucolytics  
Carbocisteine  
1-Mucodyne Capsules  
2-Carbocisteine capsules

- **Congestive heart failure**

Eplerenone

- **Renal disease**

Lanthanum  
Fosrenal

- **Cancer**

Anastrozole  
Tamoxifen  
Bicalutamide  
Oxaliplatin  
Imatinib  
Hydroxycarbamide  
Capecitamine  
Ruxolitinib

- **Ulcer disease**

\*Put in a conditional argument (Include \*azole or ranitidine if not taking NSAIDS or concomitant systemic glucocorticoid steroid.

Drugs in the class proton pump inhibitors:  
Lansoprazole  
Omeprazole  
Pantoprazole  
Rabeprazole sodium

Pariet gastro-resistant tablets [k4]  
Rabeprazole gastro-resistant tablets [k4]  
Ranitidine  
Famotidine

- **Osteoporosis**

\*Put in a conditional argument: If prednisolone AND Zoledronic acid Or Alendronic acid or Ibandronic acid, then do not code as osteoporosis

Zoledronic acid  
Alendronic acid  
Ibandronic acid  
Raloxifene hydrochloride  
Denosumab:  
Denosumab 60/1ml  
Denosumab (Prolia)

- **Dementia**

Donepezil  
Memantine

- **AIDS**

Efavirenz  
Atripla

- **Anxiety & Panic Disorders**

Diazepam  
Nitrazepam tablets  
Lorazepam

- **Depression**

Depefex XL capsules  
Citalopram tablets  
Cipramil  
Imipramine  
Lithium  
Lofepramine  
Mirtazapine  
Phenelzine  
Reboxetin

- **Neurological**

Dopamine precursors drugs:  
Co-careldopa  
Co-careldopa tablets  
Sinemet tablets  
Co-beneldopa (ingredients: levodopa and benserazide):  
Co-beneldopa capsules  
Madopar tablets  
Dopamine receptor agonists:  
Acute drug-induced dystonic reactions  
Repinex XL tablets  
Pramipexole modified-release tablets  
rotigotine patches  
Antimuscarinics drugs:  
Trihexyphenidyl hydrochloride  
Trihexyphenidyl 2mg tablets  
Procyclidine 5mg tablets  
Drugs in the class monoamine-oxidase b inhibitors  
Rasagiline  
Rasagiline tablets  
Azilect tablets  
Catechol-o-methyltransferase inhibitors class  
drugs  
Entacapone tablets  
Other:  
Ongentys hard capsules  
Stanek tablets (levodopa with carbidopa and entacapone)  
Amantadine hydrochloride tablets

- **Visual impairment**

(Includes glaucoma irrespective of visual impairment)

Drugs in the class antimuscarinics:

Cyclopentolate hydrochloride (Mydrilate)  
Minims cyclopentolate hydrochloride eye drops

Drugs in the class prostamides:

Bimatoprost with timolol (eyzeetan, Ganfort)  
Bimatoprost eye drops (Lumigan, Eyreida)

Drugs in the class prostaglandins and analogues:

Latanoprost (Medizol, Monopost, Xalatan, Xelpros)  
Travoprost (Bondulc, Travatan, Izba)

Timolol 5mg/ml eye drops

Drugs in the class beta blocking agents, non-selective:

Timolol maleate (azarga, cosopt, timoptic, betimol, tiopex)

- **No specific drug for the condition**

- Congestive heart failure
- Degenerative disc disease
- Myocardial infarction
- Cerebrovascular disease
- Peripheral vascular disease
- Liver disease
- Hearing impairment
- Hemiplegia
- Diabetes end with end organ damage (requires additional comorbidities of retinopathy, neuropathy, or nephropathy to be present)

- **Additional Table 3. Morbidity count by checklist and augmentation (n=6,342)**

| <b>Morbidity</b>                            | <b>Painful<br/>Yes/No</b> | <b>Check-list <sup>1</sup><br/>n</b> | <b>Free text <sup>2</sup><br/>n</b> | <b>Medications <sup>3</sup><br/>n</b> | <b>Total<br/>n, (%)</b> |
|---------------------------------------------|---------------------------|--------------------------------------|-------------------------------------|---------------------------------------|-------------------------|
| <b>Arthritis</b>                            | Yes                       | 1447                                 | 21                                  | 9                                     | 1477 (68)               |
| <b>Hypertension</b>                         | No                        | 779                                  | 42                                  | 35                                    | 856 (39)                |
| <b>Degenerative disc disease</b>            | Yes                       | 767                                  | 24                                  | 0                                     | 791 (36)                |
| <b>Upper gastro-intestinal</b>              | Yes                       | 0                                    | 26                                  | 658                                   | 684 (31)                |
| <b>Asthma</b>                               | No                        | 325                                  | 7                                   | 81                                    | 413 (19)                |
| <b>Diabetes without complications</b>       | No                        | 349                                  | 12                                  | 25                                    | 386 (18)                |
| <b>Osteoporosis</b>                         | Yes                       | 218                                  | 4                                   | 29                                    | 247 (11)                |
| <b>Cancer</b>                               | Yes                       | 201                                  | 30                                  | 6                                     | 237 (11)                |
| <b>Angina</b>                               | Yes                       | 197                                  | 14                                  | 17                                    | 228 (10)                |
| <b>Lung disease</b>                         | No                        | 139                                  | 38                                  | 8                                     | 185 (8)                 |
| <b>Myocardial Infarction</b>                | Yes                       | 150                                  | 0                                   | 0                                     | 150 (7)                 |
| <b>Stroke</b>                               | No                        | 126                                  | 19                                  | 0                                     | 145 (7)                 |
| <b>Kidney disease</b>                       | No                        | 116                                  | 10                                  | 0                                     | 124 (6)                 |
| <b>Depression</b>                           | Yes                       | 0                                    | 23                                  | 81                                    | 104 (5)                 |
| <b>Visual impairment</b>                    | No                        | 0                                    | 34                                  | 57                                    | 91 (4)                  |
| <b>Chronic Heart Failure</b>                | Yes                       | 60                                   | 2                                   | 1                                     | 63 (3)                  |
| <b>Neurological</b>                         | No                        | 0                                    | 35                                  | 21                                    | 56 (3)                  |
| <b>Anxiety</b>                              | No                        | 0                                    | 18                                  | 22                                    | 40 (2)                  |
| <b>Lower Gastro-intestinal</b>              | Yes                       | 0                                    | 29                                  | 0                                     | 29 (1)                  |
| <b>Hearing impairment</b>                   | No                        | 0                                    | 12                                  | 0                                     | 12 (0.5)                |
| <b>Diabetes with complications</b>          | Yes                       | 0                                    | 12                                  | 0                                     | 12 (0.5)                |
| <b>Dementia</b>                             | No                        | 9                                    | 0                                   | 0                                     | 9 (0.4)                 |
| <b>Liver disease</b>                        | Yes                       | 0                                    | 7                                   | 0                                     | 7 (0.3)                 |
| <b>Peripheral vascular disease</b>          | Yes                       | 0                                    | 6                                   | 0                                     | 6 (0.3)                 |
| <b>Hemiplegia</b>                           | No                        | 0                                    | 1                                   | 0                                     | 1 (<0.1)                |
| <b>AIDS</b>                                 | No                        | 0                                    | 1                                   | 0                                     | 1 (<0.1)                |
| <b>Subtotal illnesses in FRAIL (11)</b>     |                           | 3,889                                | 196                                 | 182                                   | 4,264                   |
| <b>Subtotal illnesses not in FRAIL (15)</b> |                           | 994                                  | 220                                 | 868                                   | 2,078                   |
| <b>Total morbidities identified</b>         |                           | 4,883                                | 413                                 | 1,050                                 | 6,342                   |

Abbreviations: AIDS – Acquired immune deficiency syndrome. Items in bold are included in FRAIL, non-FRAIL illnesses are extra morbidities from Charlson and Functional Comorbidity Indices.

Diabetes is classified as painful if the participant reports complications such as neuropathy (Charcot foot), and retinopathy.

1 - morbidity appeared in checklist. This included all FRAIL illnesses plus degenerative disc disease, osteoporosis, and dementia. 2 - morbidity appeared in free text only. 3 - morbidity is inferred from medication only.

Note: there is an order of precedence to columns, the morbidity is counted as present in the following order 1) checklist; 2) free text; 3) medication; and counted once even though it may be originally reported in all three ways.

1159 (53%) of participants reported free text morbidities and 2088 (96%) reported medications.



- **Additional Table 4. Bivariate associations between morbidity count and covariables.**

| <i>Variable</i>     | <i>'Any' morbidity</i> | <i>Bivariate association β Coef. (95% CI)</i> | <i>Painful morbidity</i> | <i>Bivariate association β Coef. (95% CI)</i> | <i>Non-painful morbidity</i> | <i>Bivariate β Coef. (95% CI)</i> |
|---------------------|------------------------|-----------------------------------------------|--------------------------|-----------------------------------------------|------------------------------|-----------------------------------|
| <i>Sex:</i>         |                        |                                               |                          |                                               |                              |                                   |
| <i>Male,</i>        | 3 (2-4)                | Ref                                           | 2 (1-2)                  | Ref                                           | 1 (1-1)                      | Ref                               |
| <i>Female</i>       | 3 (2-4)                | 0.14 (0.03, 0.29), p=0.045                    | 2 (1-3)                  | 0.17 (0.07, 0.28), p=0.001                    | 1 (0-2)                      | -0.03 (-0.11, 0.05), p=0.455      |
| <i>Age (years)</i>  | 73 (69-79) *           | 0.01 (-0.001, 0.02), p=0.064                  | 73 (69-79) *             | 0.01 (0.001, 0.02), p=0.02                    | 73 (69-79) *                 | 0.001 (-0.005, 0.007), p=0.746    |
| <i>BMI Classes#</i> |                        |                                               |                          |                                               |                              |                                   |
| <i>Underweight</i>  | 3 (1-4)                | 0.17 (-0.44, 0.78), p=0.582                   | 2 (1-3)                  | 0.25 (-0.21, 0.71), p=0.289                   | 1 (0-1)                      | -0.09 (-0.44, 0.26), p=0.616      |
| <i>Normal</i>       | 2 (1-4)                | Ref                                           | 2 (1-3)                  | Ref                                           | 1 (0-1)                      | Ref                               |
| <i>Pre-obese</i>    | 3 (2-4)                | 0.20 (0.03, 0.37), p=0.021                    | 2 (1-3)                  | 0.13 (-0.003, 0.26), p=0.055                  | 1 (0-2)                      | 0.07 (-0.03, 0.17), p=0.134       |
| <i>Obese</i>        | 3 (2-4)                | 0.52 (0.34, 0.71), p<0.001                    | 2 (1-3)                  | 0.27 (0.13, 0.41), p<0.001                    | 1 (1-2)                      | 0.26 (0.15, 0.36), p<0.001        |

\*Median age of participants with ≥1 morbidity count. Data are from n=2,155 participants

Abbreviations: BMI – Body Mass Index; β Coef. –beta coefficient; CI – 95% confidence intervals; Ref - reference group. #WHO classification for BMI (kg/m<sup>2</sup>), underweight <18.5, normal 18.5-24.9, pre-obese 25-29.9 and >30 obese.

- **Additional Table 5. Associations of frailty with standardised NRS pain and other characteristics.**

| Factor                    | Interval/category     | Frailty                    |
|---------------------------|-----------------------|----------------------------|
|                           |                       | aOR (95%CI)                |
| NRS pain                  | Standardised NRS pain | 3.32 (2.79, 3.95), p<0.001 |
| Painful comorbidities     | Standardised count    | 1.37 (1.20, 1.56), p<0.001 |
| Non-painful comorbidities | Standardised count    | 1.39 (1.24, 1.58), p<0.001 |
| Sex                       | Male                  | Ref                        |
|                           | Female                | 1.36 (1.04, 1.76), p<0.024 |
| Age                       | Years                 | 1.03 (1.01, 1.05), p=0.001 |
| BMI Class <sup>#</sup>    | Underweight           | 3.49 (1.34, 9.09), p=0.011 |
|                           | Normal                | Ref                        |
|                           | Pre-obese             | 1.43 (1.01, 2.01), p=0.041 |
|                           | Obese                 | 2.15 (1.53, 3.02), p<0.001 |
| Pseudo r <sup>2</sup>     |                       | 0.2323                     |

The outcome measure is binary frailty without morbidity (mFRAIL), defined as mFRAIL score >2. The model is frailty with standardised painful and non-painful comorbidities adjusted for standardised pain severity, age, sex, and BMI class. Data are from n=2,015 participants. Standardized coefficients represent the change in the dependent variable's standard deviation associated with a one-standard-deviation increase in the predictor variable, they permit comparison of variable with different scales. Abbreviations: NRS – numerical rating score; BMI – Body Mass Index; aOR –adjusted odds ratio; CI – 95% confidence intervals; Ref - reference group. NA - Not Applicable <sup>#</sup>WHO classification for BMI (kg/m<sup>2</sup>), underweight <18.5, normal 18.5-24.9, pre-obese 25-29.9 and >30 obese.
